# Supplementary material for: DEGnext: classification of differentially expressed genes from RNA-seq data using a convolutional neural network with transfer learning
Source: Springer Nature journal article supplement (doi:10.1186/s12859-021-04527-4), 2022-01-06
Supplement: MOESM1 [file 12859_2021_4527_MOESM1_ESM.pdf]

Table S1: ROC scores of DEGnext and ML methods for general learning on bio-test data (T3) for all 17 datasets

| Dataset | Method  | accuracy | recall | precision | F-measure | MCC  | ROC-scores |
|---------|---------|----------|--------|-----------|-----------|------|------------|
| BLCA    | DEGnext | 98.42    | 98.42  | 98.49     | 0.98      | 0.97 | 0.99       |
|         | DTC     | 84.65    | 84.65  | 86.08     | 0.85      | 0.69 | 0.88       |
|         | KNN     | 90.18    | 90.18  | 90.21     | 0.9       | 0.79 | 0.94       |
|         | RFC     | 90.58    | 90.58  | 90.77     | 0.91      | 0.8  | 0.96       |
|         | SVC     | 85.08    | 85.08  | 86.25     | 0.85      | 0.69 | 0.94       |
|         | XGBoost | 92.93    | 92.93  | 93.09     | 0.93      | 0.85 | 0.99       |
| BRCA    | DEGnext | 98.8     | 98.8   | 98.83     | 0.99      | 0.98 | 0.99       |
|         | DTC     | 76.54    | 76.54  | 77.75     | 0.76      | 0.52 | 0.83       |
|         | KNN     | 89.77    | 89.77  | 89.84     | 0.9       | 0.79 | 0.96       |
|         | RFC     | 94.93    | 94.93  | 94.96     | 0.95      | 0.9  | 0.98       |
|         | SVC     | 82.81    | 82.81  | 86.68     | 0.82      | 0.67 | 0.99       |
|         | XGBoost | 96.52    | 96.52  | 96.55     | 0.97      | 0.93 | 0.99       |
| CHOL    | DEGnext | 100      | 100    | 100       | 1         | 1    | 0.99       |
|         | DTC     | 91.47    | 91.47  | 91.4      | 0.91      | 0.71 | 0.83       |
|         | KNN     | 99.28    | 99.28  | 99.29     | 0.99      | 0.98 | 0.99       |
|         | RFC     | 98.55    | 98.55  | 98.57     | 0.99      | 0.95 | 0.99       |
|         | SVC     | 90.76    | 90.76  | 91.77     | 0.9       | 0.69 | 0.99       |
|         | XGBoost | 98.36    | 98.36  | 98.38     | 0.98      | 0.95 | 0.99       |
| COAD    | DEGnext | 99.64    | 99.64  | 99.65     | 1         | 0.99 | 0.99       |
|         | DTC     | 75.12    | 75.12  | 76.58     | 0.75      | 0.51 | 0.81       |
|         | KNN     | 95.78    | 95.78  | 95.83     | 0.96      | 0.91 | 0.99       |
|         | RFC     | 96.35    | 96.35  | 96.39     | 0.96      | 0.93 | 0.99       |
|         | SVC     | 92.5     | 92.5   | 93.67     | 0.92      | 0.86 | 0.99       |
|         | XGBoost | 97.93    | 97.93  | 97.94     | 0.98      | 0.96 | 0.99       |
| ESCA    | DEGnext | 97.95    | 97.95  | 98.1      | 0.98      | 0.96 | 0.99       |
|         | DTC     | 77.08    | 77.08  | 80.64     | 0.76      | 0.5  | 0.79       |
|         | KNN     | 92.22    | 92.22  | 92.53     | 0.92      | 0.82 | 0.95       |
|         | RFC     | 91.2     | 91.2   | 91.54     | 0.91      | 0.8  | 0.96       |
|         | SVC     | 76.73    | 76.73  | 82.93     | 0.71      | 0.44 | 0.94       |
|         | XGBoost | 93.76    | 93.76  | 94.31     | 0.94      | 0.86 | 0.97       |
| HNSC    | DEGnext | 99.32    | 99.32  | 99.34     | 0.99      | 0.98 | 0.99       |
|         | DTC     | 78.88    | 78.88  | 79.09     | 0.79      | 0.51 | 0.77       |
|         | KNN     | 89.5     | 89.5   | 89.73     | 0.89      | 0.75 | 0.95       |
|         | RFC     | 94.28    | 94.28  | 94.44     | 0.94      | 0.87 | 0.98       |
|         | SVC     | 75.88    | 75.88  | 82.22     | 0.7       | 0.41 | 0.97       |
|         | XGBoost | 95.23    | 95.23  | 95.34     | 0.95      | 0.89 | 0.99       |
| KICH    | DEGnext | 100      | 100    | 100       | 1         | 1    | 0.99       |
|         | DTC     | 83.39    | 83.39  | 84.81     | 0.82      | 0.6  | 0.82       |
|         | KNN     | 96.69    | 96.69  | 96.76     | 0.97      | 0.92 | 0.97       |
|         | RFC     | 94.77    | 94.77  | 95.23     | 0.95      | 0.88 | 0.99       |
|         | SVC     | 90.17    | 90.17  | 91.15     | 0.9       | 0.77 | 0.99       |
|         | XGBoost | 95.12    | 95.12  | 95.2      | 0.95      | 0.89 | 0.99       |
| KIRC    | DEGnext | 99.78    | 99.78  | 99.78     | 1         | 1    | 0.99       |
|         | DTC     | 74.51    | 74.51  | 75.07     | 0.74      | 0.49 | 0.77       |
|         | KNN     | 87.47    | 87.47  | 88.19     | 0.87      | 0.75 | 0.95       |
|         | RFC     | 92.75    | 92.75  | 92.98     | 0.93      | 0.86 | 0.97       |
|         | SVC     | 71.65    | 71.65  | 79.41     | 0.68      | 0.48 | 0.95       |
|         | XGBoost | 92.75    | 92.75  | 92.85     | 0.93      | 0.85 | 0.98       |
| KIRP    | DEGnext | 100      | 100    | 100       | 1         | 1    | 0.99       |
|         | DTC     | 74.77    | 74.77  | 75.81     | 0.74      | 0.48 | 0.76       |
|         | KNN     | 88.15    | 88.15  | 89.91     | 0.88      | 0.77 | 0.96       |
|         | RFC     | 91.43    | 91.43  | 92.1      | 0.91      | 0.83 | 0.98       |
|         | SVC     | 80.34    | 80.34  | 85.33     | 0.79      | 0.63 | 0.95       |
|         | XGBoost | 92.87    | 92.87  | 93.33     | 0.93      | 0.86 | 0.98       |
| LIHC    | DEGnext | 95.93    | 95.93  | 96.23     | 0.96      | 0.85 | 0.96       |
|         | DTC     | 89.18    | 89.18  | 88.92     | 0.87      | 0.46 | 0.76       |
|         | KNN     | 93.99    | 93.99  | 94.03     | 0.93      | 0.73 | 0.93       |
|         | RFC     | 96.66    | 96.66  | 96.65     | 0.97      | 0.85 | 0.98       |
|         | SVC     | 88.85    | 88.85  | 90.19     | 0.85      | 0.41 | 0.97       |

*Continue on the next page*

Table S1: ROC scores of DEGnext and ML methods for general learning on bio-test data (T3) for all 17 datasets (cont.).

| Dataset | Method  | accuracy | recall | precision | F-measure | MCC  | ROC-scores |
|---------|---------|----------|--------|-----------|-----------|------|------------|
|         | XGBoost | 96.46    | 96.46  | 96.44     | 0.96      | 0.84 | 0.99       |
| LUAD    | DEGnext | 99.82    | 99.82  | 99.83     | 1         | 1    | 0.99       |
|         | DTC     | 79.68    | 79.68  | 80.18     | 0.8       | 0.54 | 0.82       |
|         | KNN     | 89.26    | 89.26  | 89.4      | 0.89      | 0.75 | 0.94       |
|         | RFC     | 93.63    | 93.63  | 93.62     | 0.94      | 0.85 | 0.97       |
|         | SVC     | 82.54    | 82.54  | 86.32     | 0.8       | 0.61 | 0.98       |
|         | XGBoost | 95.06    | 95.06  | 95.22     | 0.95      | 0.89 | 0.98       |
| LUSC    | DEGnext | 99.88    | 99.88  | 99.88     | 1         | 1    | 0.99       |
|         | DTC     | 78.66    | 78.66  | 80.63     | 0.79      | 0.58 | 0.83       |
|         | KNN     | 94.16    | 94.16  | 94.47     | 0.94      | 0.88 | 0.98       |
|         | RFC     | 96.31    | 96.31  | 96.4      | 0.96      | 0.92 | 0.99       |
|         | SVC     | 90.47    | 90.47  | 92.2      | 0.9       | 0.81 | 0.99       |
|         | XGBoost | 97.85    | 97.85  | 97.9      | 0.98      | 0.96 | 0.99       |
| PRAD    | DEGnext | 99.35    | 99.35  | 99.36     | 0.99      | 0.99 | 0.99       |
|         | DTC     | 77.78    | 77.78  | 79.42     | 0.77      | 0.56 | 0.84       |
|         | KNN     | 93.7     | 93.7   | 93.79     | 0.94      | 0.87 | 0.98       |
|         | RFC     | 94.35    | 94.35  | 94.42     | 0.94      | 0.89 | 0.98       |
|         | SVC     | 84.81    | 84.81  | 86.87     | 0.85      | 0.72 | 0.96       |
|         | XGBoost | 95.28    | 95.28  | 95.36     | 0.95      | 0.91 | 0.99       |
| READ    | DEGnext | 95.39    | 95.39  | 96.54     | 0.95      | 0.92 | 0.99       |
|         | DTC     | 88.65    | 88.65  | 89.12     | 0.89      | 0.78 | 0.89       |
|         | KNN     | 88.8     | 88.8   | 89.35     | 0.89      | 0.78 | 0.95       |
|         | RFC     | 88       | 88     | 89.52     | 0.88      | 0.78 | 0.96       |
|         | SVC     | 79.54    | 79.54  | 83.54     | 0.79      | 0.63 | 0.93       |
|         | XGBoost | 92       | 92     | 92.57     | 0.92      | 0.84 | 0.98       |
| STAD    | DEGnext | 96.89    | 96.89  | 97.06     | 0.97      | 0.93 | 0.99       |
|         | DTC     | 78.35    | 78.35  | 78.23     | 0.77      | 0.48 | 0.76       |
|         | KNN     | 88.93    | 88.93  | 90.19     | 0.88      | 0.75 | 0.96       |
|         | RFC     | 89.69    | 89.69  | 89.72     | 0.9       | 0.76 | 0.95       |
|         | SVC     | 71.15    | 71.15  | 77.64     | 0.62      | 0.27 | 0.97       |
|         | XGBoost | 93.81    | 93.81  | 94.06     | 0.94      | 0.86 | 0.98       |
| THCA    | DEGnext | 99.87    | 99.87  | 99.87     | 1         | 1    | 0.99       |
|         | DTC     | 76.24    | 76.24  | 76.45     | 0.75      | 0.46 | 0.74       |
|         | KNN     | 92.41    | 92.41  | 92.8      | 0.92      | 0.83 | 0.96       |
|         | RFC     | 96.37    | 96.37  | 96.43     | 0.96      | 0.92 | 0.99       |
|         | SVC     | 86.54    | 86.54  | 88.5      | 0.86      | 0.71 | 0.98       |
|         | XGBoost | 97.89    | 97.89  | 97.91     | 0.98      | 0.95 | 0.99       |
| UCEC    | DEGnext | 99.6     | 99.6   | 99.61     | 1         | 0.99 | 0.99       |
|         | DTC     | 78.08    | 78.08  | 78.4      | 0.78      | 0.56 | 0.82       |
|         | KNN     | 90.59    | 90.59  | 91.15     | 0.91      | 0.82 | 0.97       |
|         | RFC     | 95.6     | 95.6   | 95.68     | 0.96      | 0.91 | 0.99       |
|         | SVC     | 85.59    | 85.59  | 87.58     | 0.86      | 0.73 | 0.97       |
|         | XGBoost | 97.3     | 97.3   | 97.33     | 0.97      | 0.95 | 0.99       |

Table S2: ROC scores of DEGnext and ML methods for transfer learning on 100% of bio data (Q) for 8 testing datasets, namely BLCA, CHOL, COAD, ESCA, HNSC, KICH, READ, and STAD

| Dataset | Method  | accuracy | recall | precision | F-measure | MCC  | ROC-scores |
|---------|---------|----------|--------|-----------|-----------|------|------------|
| BLCA    | DEGnext | 95.69    | 95.69  | 95.76     | 0.96      | 0.91 | 0.95       |
|         | DTC     | 88.58    | 88.58  | 89.03     | 0.88      | 0.76 | 0.96       |
|         | KNN     | 91.34    | 91.34  | 91.35     | 0.91      | 0.82 | 0.98       |
|         | RFC     | 99.61    | 99.61  | 99.61     | 1         | 0.99 | 1          |
|         | SVC     | 90.94    | 90.94  | 91.08     | 0.91      | 0.81 | 0.98       |
|         | XGBoost | 99.21    | 99.21  | 99.22     | 0.99      | 0.98 | 1          |
| CHOL    | DEGnext | 98.26    | 98.26  | 98.49     | 0.98      | 0.94 | 0.99       |
|         | DTC     | 94.2     | 94.2   | 94.13     | 0.94      | 0.81 | 0.88       |
|         | KNN     | 99.82    | 99.82  | 99.82     | 1         | 0.99 | 1          |
|         | RFC     | 99.82    | 99.82  | 99.82     | 1         | 0.99 | 1          |
|         | SVC     | 91.3     | 91.3   | 92.16     | 0.9       | 0.71 | 1          |
|         | XGBoost | 100      | 100    | 100       | 1         | 1    | 1          |
| COAD    | DEGnext | 84.21    | 84.21  | 88.44     | 0.84      | 0.72 | 0.86       |
|         | DTC     | 78.98    | 78.98  | 80.57     | 0.79      | 0.59 | 0.84       |
|         | KNN     | 97.64    | 97.64  | 97.65     | 0.98      | 0.95 | 1          |
|         | RFC     | 99.36    | 99.36  | 99.36     | 0.99      | 0.99 | 1          |
|         | SVC     | 96.35    | 96.35  | 96.57     | 0.96      | 0.93 | 1          |
|         | XGBoost | 99.79    | 99.79  | 99.79     | 1         | 1    | 1          |
| ESCA    | DEGnext | 92.97    | 92.97  | 94.68     | 0.93      | 0.61 | 0.93       |
|         | DTC     | 91.71    | 91.71  | 92.62     | 0.91      | 0.82 | 0.93       |
|         | KNN     | 94.82    | 94.82  | 94.89     | 0.95      | 0.88 | 0.99       |
|         | RFC     | 99.48    | 99.48  | 99.49     | 0.99      | 0.99 | 1          |
|         | SVC     | 91.19    | 91.19  | 91.89     | 0.91      | 0.8  | 0.99       |
|         | XGBoost | 99.48    | 99.48  | 99.49     | 0.99      | 0.99 | 1          |
| HNSC    | DEGnext | 98.44    | 98.44  | 98.49     | 0.98      | 0.96 | 0.98       |
|         | DTC     | 82.43    | 82.43  | 83.5      | 0.83      | 0.61 | 0.84       |
|         | KNN     | 92.37    | 92.37  | 92.33     | 0.92      | 0.82 | 0.98       |
|         | RFC     | 99.46    | 99.46  | 99.46     | 0.99      | 0.99 | 1          |
|         | SVC     | 76.57    | 76.57  | 82.53     | 0.71      | 0.43 | 0.99       |
|         | XGBoost | 99.46    | 99.46  | 99.46     | 0.99      | 0.99 | 1          |
| KICH    | DEGnext | 98.75    | 98.75  | 98.79     | 0.99      | 0.97 | 0.98       |
|         | DTC     | 88.24    | 88.24  | 88.33     | 0.88      | 0.72 | 0.87       |
|         | KNN     | 98.37    | 98.37  | 98.37     | 0.98      | 0.96 | 1          |
|         | RFC     | 99.67    | 99.67  | 99.68     | 1         | 0.99 | 1          |
|         | SVC     | 92.81    | 92.81  | 93.49     | 0.93      | 0.83 | 0.99       |
|         | XGBoost | 99.67    | 99.67  | 99.68     | 1         | 0.99 | 1          |
| READ    | DEGnext | 86.05    | 86.05  | 89.23     | 0.86      | 0.75 | 0.87       |
|         | DTC     | 95.87    | 95.87  | 95.97     | 0.96      | 0.92 | 0.96       |
|         | KNN     | 95.04    | 95.04  | 95.04     | 0.95      | 0.9  | 0.99       |
|         | RFC     | 99.17    | 99.17  | 99.19     | 0.99      | 0.98 | 1          |
|         | SVC     | 76.03    | 76.03  | 80.71     | 0.75      | 0.57 | 0.95       |
|         | XGBoost | 100      | 100    | 100       | 1         | 1    | 1          |
| STAD    | DEGnext | 97.77    | 97.77  | 97.89     | 0.98      | 0.95 | 0.96       |
|         | DTC     | 85.31    | 85.31  | 85.21     | 0.85      | 0.65 | 0.83       |
|         | KNN     | 92.78    | 92.78  | 93.34     | 0.93      | 0.84 | 0.99       |
|         | RFC     | 98.45    | 98.45  | 98.45     | 0.98      | 0.96 | 1          |
|         | SVC     | 82.22    | 82.22  | 85.92     | 0.8       | 0.6  | 0.99       |
|         | XGBoost | 99.74    | 99.74  | 99.74     | 1         | 0.99 | 1          |
